# Supplementary material for: Aboriginal Australian mitochondrial genome variation – an increased understanding of population antiquity and diversity
Source: PubMed Central journal article supplement (PMC5347126; doi:10.1038/srep43041), 2017-03-13
Supplement: srep43041-s1.pdf [file srep43041-s1.pdf]

## **SUPPLEMENTARY INFORMATION**

**Title:** Aboriginal Australian mitochondrial genome variation – an increased understanding of population antiquity and diversity

**Authors:**

Nano Nagle (1), Mannis van Oven (2), Stephen Wilcox (3), Sheila van Holst Pellekaan (4,5), Chris Tyler-Smith (6), Yali Xue (6), Kaye N. Ballantyne (2,7), Leah Wilcox (1), Luka Papac (1), Karen Cooke (1), Roland A.H van Oorschot (7), Peter McAllister (8), Lesley Williams (9), Manfred Kayser (2) Robert J. Mitchell (1)\* and The Genographic Consortium (#)

**Supplementary Table 1.** Geographical distribution of Aboriginal Australian mitogenomes of the present study

| Haplogroup               | State    |       |                 |       |            |       |          |       |                   |       |       |       |
|--------------------------|----------|-------|-----------------|-------|------------|-------|----------|-------|-------------------|-------|-------|-------|
|                          | Victoria | %     | New South Wales | %     | Queensland | %     | Tasmania | %     | Western Australia | %     | Total | %     |
| <i>Macrohaplogroup M</i> |          |       |                 |       |            |       |          |       |                   |       |       |       |
| M(xM42a)                 | 2        | 33.33 | 1               | 7.14  | 17         | 16.50 |          |       | 1                 | 50.00 | 21    | 16.54 |
| M42a                     |          |       | 1               | 7.14  | 10         | 9.71  |          |       |                   |       | 11    | 8.66  |
| Q                        |          |       |                 |       | 3          | 2.91  |          |       |                   |       | 3     | 2.36  |
| <i>Macrohaplogroup N</i> |          |       |                 |       |            |       |          |       |                   |       |       |       |
| N*                       |          |       |                 |       | 2          | 1.94  |          |       |                   |       | 2     | 1.57  |
| O                        |          |       |                 |       | 4          | 3.88  |          |       |                   |       | 4     | 3.15  |
| S                        | 1        | 16.67 | 6               | 42.86 | 24         | 23.30 | 1        | 50.00 |                   |       | 32    | 25.20 |
| <i>Haplogroup R</i>      |          |       |                 |       |            |       |          |       |                   |       |       |       |
| P                        | 3        | 50.00 | 6               | 42.86 | 43         | 41.75 | 1        | 50.00 | 1                 | 50.00 | 54    | 42.52 |
| Total                    | 6        | 4.72  | 14              | 11.02 | 103        | 81.10 | 2        | 1.57  | 2                 | 1.57  | 127   |       |

**Supplementary Table 2.** Distribution of mtDNA haplogroups in Aboriginal Australian populations after mtSNP typing

| SNP Result               | Haplogroup | State    |       |                 |       |            |       |          |       | Total | %     |                   |       |
|--------------------------|------------|----------|-------|-----------------|-------|------------|-------|----------|-------|-------|-------|-------------------|-------|
|                          |            | Victoria | %     | New South Wales | %     | Queensland | %     | Tasmania | %     |       |       | Western Australia | %     |
| <i>Macrohaplogroup M</i> |            |          |       |                 |       |            |       |          |       |       |       |                   |       |
|                          | M(xM42a)   | 5        | 33.33 | 9               | 18.37 | 45         | 14.52 |          |       | 3     | 75.00 | 62                | 16.27 |
|                          | M42a       | 2        | 13.33 | 3               | 6.12  | 37         | 11.94 |          |       |       |       | 42                | 11.02 |
|                          | Q          |          |       | 1               | 2.04  | 11         | 3.55  |          |       |       |       | 12                | 3.15  |
| <i>Macrohaplogroup N</i> |            |          |       |                 |       |            |       |          |       |       |       |                   |       |
|                          | N*         |          |       |                 |       | 11         | 3.55  |          |       |       |       | 11                | 2.89  |
|                          | O          |          |       | 4               | 8.16  | 8          | 2.58  |          |       |       |       | 12                | 3.15  |
|                          | S          | 4        | 26.67 | 13              | 26.53 | 58         | 18.71 | 1        | 33.33 | 1     | 25.00 | 77                | 20.21 |
| <i>Haplogroup R</i>      |            |          |       |                 |       |            |       |          |       |       |       |                   |       |
|                          | P          | 4        | 26.67 | 19              | 38.78 | 140        | 45.16 | 2        | 66.67 |       |       | 165               | 43.31 |
| <b>Total</b>             |            | 15       | 3.94  | 49              | 12.86 | 310        | 81.36 | 3        | 0.79  | 4     | 1.05  | 381               |       |

**Supplementary Table 3.** TMRCA of Aboriginal Australian mitochondrial haplogroups and subhaplogroups

| Haplogroup | Fu et al. (2013) |         | Soares et al. (2009) |             |
|------------|------------------|---------|----------------------|-------------|
|            | Median (KY)      | 95% HPD | Median (KY)          | 95% CI (KY) |
| M          | 66               | 53 - 80 | 56                   | 46 - 67     |
| M15        | 31               | 19 - 43 | 67                   | 46 - 89     |
| M42a       | 36               | 27 - 46 | 39                   | 31 - 47     |
| M42a1      | 33               | 25 - 42 | 40                   | 30 - 50     |
| M42a1a     | 25               | 19 - 33 | 35                   | 25 - 45     |
| M42a1a1    | 16               | 8 - 24  | 19                   | 8 - 30      |
| M42a1a2    | 23               | 17 - 31 | 33                   | 23 - 42     |
| M42a1a2a   | 17               | 11 - 23 | 27                   | 15 - 39     |
| M42a1a2b   | 12               | 7 - 18  | 22                   | 12 - 32     |
| M42a1b     | 20               | 12 - 29 | 34                   | 20 - 49     |
| M42c       | 46               | 35 - 58 | 43                   | 29 - 58     |
| M42c1      | 7                | 2 - 14  | 7                    | 1 - 13      |
| M42c2      | 42               | 31 - 54 | 34                   | 24 - 44     |
| M42c2a     | 28               | 19 - 38 | 30                   | 20 - 41     |
| M42c2a1    | 14               | 8 - 20  | 17                   | 9 - 25      |
| M42c2a2    | 16               | 10 - 23 | 20                   | 11 - 30     |
| M42b       | 46               | 35 - 58 | 53                   | 34 - 72     |
| M42a'c     | 53               | 42 - 66 | 50                   | 39 - 62     |
| M42a'b'c   | 58               | 46 - 71 | 60                   | 47 - 73     |
| Q          | 44               | 34 - 55 | 53                   | 37 - 68     |
| Q1         | 23               | 17 - 30 | 24                   | 17 - 32     |
| Q2         | 34               | 24 - 44 | 27                   | 20 - 35     |
| Q3         | 31               | 22 - 41 | 35                   | 27 - 43     |
| N          | 67               | 54 - 81 | 66                   | 53 - 80     |
| N13        | 32               | 22 - 44 | 38                   | 26 - 52     |
| N13a       | 25               | 16 - 35 | 34                   | 20 - 48     |
| N13a1      | 11               | 5 - 18  | 15                   | 6 - 24      |
| O          | 37               | 25 - 50 | 43                   | 28 - 59     |
| O1         | 25               | 16 - 36 | 20                   | 12 - 29     |
| O1a        | 12               | 7 - 18  | 19                   | 11 - 29     |
| O1a1       | 7                | 3 - 12  | 17                   | 10 - 24     |
| O2         | 24               | 14 - 35 | 22                   | 13 - 32     |
| S          | 51               | 40 - 64 | 49                   | 39 - 59     |
| S1         | 42               | 32 - 53 | 48                   | 35 - 62     |
| S1a        | 22               | 15 - 29 | 20                   | 12 - 29     |
| S1a1       | 17               | 12 - 24 | 12                   | 8 - 16      |
| S1b        | 21               | 15 - 28 | 29                   | 22 - 37     |
| S1b1       | 16               | 10 - 22 | 20                   | 11 - 30     |
| S1b1a      | 10               | 6 - 16  | 15                   | 6 - 24      |
| S1b2       | 10               | 5 - 16  | 9                    | 2 - 17      |
| S1b3       | 12               | 7 - 17  | 12                   | 4 - 20      |
| S2         | 32               | 24 - 42 | 34                   | 25 - 44     |
| S2a        | 25               | 18 - 34 | 29                   | 20 - 38     |
| S2a1       | 18               | 12 - 25 | 21                   | 12 - 31     |
| S2a1a      | 11               | 7 - 16  | 12                   | 6 - 19      |
| S2a2       | 18               | 11 - 26 | 26                   | 14 - 38     |
| S2b        | 26               | 18 - 35 | 30                   | 19 - 42     |
| S2b1       | 16               | 9 - 25  | 18                   | 10 - 27     |
| S2b2       | 19               | 12 - 27 | 26                   | 15 - 37     |
| S3         | 3                | 1 - 7   | 8                    | 0 - 17      |
| P          | 60               | 50 - 73 | 62                   | 54 - 70     |
| P1         | 38               | 29 - 48 | 39                   | 31 - 47     |
| P1d        | 32               | 24 - 40 | 36                   | 28 - 45     |
| P1d1       | 23               | 16 - 31 | 33                   | 21 - 45     |
| P1d1b      | 19               | 12 - 26 | 30                   | 17 - 43     |
| P1d1b1     | 10               | 5 - 16  | 16                   | 7 - 26      |
| P1d2       | 26               | 19 - 35 | 28                   | 15 - 41     |
| P1e        | 26               | 16 - 37 | 30                   | 17 - 44     |
| P1e1       | 11               | 5 - 19  | 14                   | 6 - 23      |
| P1e1a      | 3                | 0.3 - 7 | 3                    | 0 - 6       |
| P2         | 39               | 28 - 50 | 29                   | 20 - 38     |
| P2a        | 23               | 15 - 32 | 19                   | 12 - 27     |
| P2b        | 4                | 1 - 8   | 4                    | 0 - 8       |
| P3         | 43               | 33 - 54 | 44                   | 26 - 62     |
| P3a        | 26               | 17 - 35 | 6                    | 0 - 13      |
| P3b        | 34               | 26 - 44 | 35                   | 24 - 45     |
| P3b1       | 30               | 22 - 39 | 30                   | 20 - 41     |
| P3b1a      | 20               | 13 - 28 | 11                   | 0 - 22      |
| P3b2       | 29               | 20 - 39 | 21                   | 12 - 29     |
| P4         | 18               | 12 - 26 | 22                   | 14 - 30     |
| P4a        | 13               | 8 - 19  | 20                   | 10 - 31     |
| P5         | 31               | 23 - 41 | 28                   | 18 - 39     |
| P5a        | 23               | 16 - 30 | 22                   | 13 - 30     |
| P5a1       | 19               | 14 - 25 | 19                   | 11 - 27     |
| P5a1a      | 15               | 11 - 20 | 14                   | 8 - 20      |
| P5a1a1     | 13               | 9 - 18  | 12                   | 6 - 19      |
| P5a2       | 17               | 10 - 24 | 20                   | 11 - 30     |
| P5b        | 19               | 12 - 28 | 21                   | 10 - 32     |
| P6         | 43               | 32 - 56 | 54                   | 38 - 70     |
| P6a        | 12               | 5 - 19  | 16                   | 7 - 26      |
| P6b        | 32               | 22 - 43 | 44                   | 26 - 63     |
| P8         | 49               | 37 - 61 | 47                   | 36 - 59     |
| P8a        | 16               | 8 - 25  | 19                   | 9 - 30      |
| P9         | 40               | 30 - 52 | 59                   | 38 - 82     |
| P9a        | 35               | 24 - 46 | 40                   | 18 - 63     |
| P10        | 4                | 1 - 9   | 7                    | 2 - 13      |
| P11        | 50               | 39 - 62 | 39                   | 29 - 48     |
| P11a       | 37               | 27 - 48 | 31                   | 21 - 41     |
| P11a1      | 18               | 11 - 26 | 20                   | 13 - 28     |
| P12        | 46               | 36 - 57 | 57                   | 38 - 77     |
| P12a       | 32               | 23 - 42 | 32                   | 19 - 45     |
| P12a1      | 24               | 16 - 32 | 16                   | 9 - 24      |
| P12b       | 15               | 9 - 22  | 15                   | 7 - 24      |

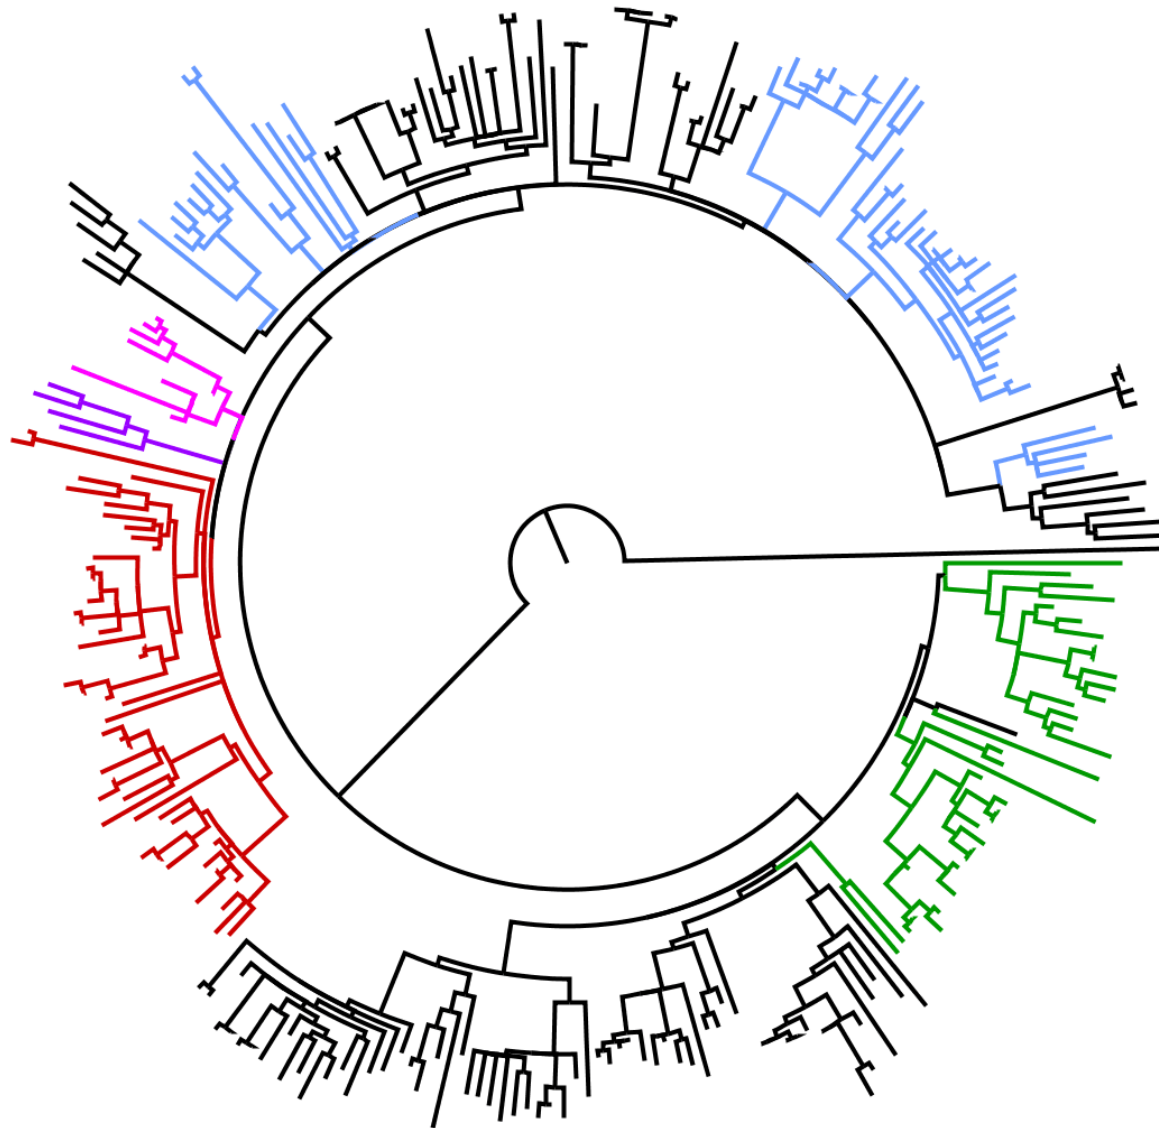

**Supplementary Figure 4.** A maximum likelihood phylogeny of Island Melanesian, Philippine, Indian and Aboriginal Australian mitochondrial haplogroups. Australian sequences are coloured as: M, green; S, red; O, magenta, N13, purple and P, light blue.

## **Supplementary Document: Sample Characteristics and Treatment**

We cannot be certain that the mtDNAs reflect the ‘ancestral’ region where the samples were collected and this is especially true for mtDNA as traditionally females in many communities moved on marriage to their husband’s clan territory (the grandmother’s group affiliation could well differ from that of her granddaughter).

Subsequent to the European invasion there has been forced removal of Aboriginal Australians from their homelands into Government or religious settlements, restrictions on marriage and the forced removal of children from their parents. Added to this has been the progressive exodus from rural areas into the cities for employment. As a result of this turmoil much of the language and clan structure has dissolved, and this is especially so in the eastern States from which most of the samples are drawn. Therefore, seeking language or even tribal affiliation of people, most of whom have been separated from their traditional homeland and lifestyle from birth, would create a negative feeling among them. It is for this reason we report the variation only at State level as we feel confident that this is reasonably accurate. Any attempt at a reconstruction of the past genetic structure of Aboriginal Australia has to factor in this treatment for nearly 200 years.

## Supplementary Experimental Procedures

### 1 Methods

#### 1.1 Human mt DNA amplification

In order to create baits, the human mitogenome was broken into 12 overlapping PCR amplicon sets (see table below) using a subset of primer pairs from Rieder, et al. <sup>1</sup>.

| PCR name | Paper name | F primer start | R primer start | amplicon size |
|----------|------------|----------------|----------------|---------------|
| A        | 2F & 3R    | 1245           | 2669           | 1424          |
| B        | 4F & 5R    | 2499           | 3961           | 1462          |
| C        | 6F & 7R    | 3796           | 5420           | 1624          |
| D        | 8F & 9R    | 5255           | 6642           | 1387          |
| E        | 10F & 11R  | 6469           | 8095           | 1626          |
| F        | 12F & 13R  | 7937           | 9397           | 1460          |
| G        | 14F & 15R  | 9230           | 10837          | 1607          |
| H        | 16F & 17R  | 10672          | 12076          | 1404          |
| J        | 18F & 19R  | 11948          | 13507          | 1559          |
| K        | 20F & 21R  | 13338          | 14998          | 1660          |
| L        | 22F & 23R  | 14856          | 5              | 1720          |
| M        | 24F & 1R   | 16240          | 1411           | 1742          |

Each PCR was undertaken using PCR conditions outlined in Rieder, et al. <sup>1</sup>

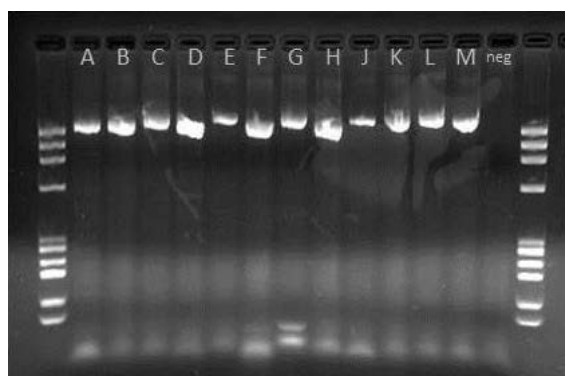

#### 1.2 Preparing PCR amplicons for mitochondrial baits

To construct targeted mtDNA baits, the 12 PCR products were pooled in equal molar ratios and cleaned using AMPure XP beads (0.6x) to remove any DNA fragments below 500 bp. The cleaned pool was then sheared to a size range of 100-200 base pairs in size using the Covaris S220

instrument using the following process (peak power – 175, duty factor – 10%, cycles/burst – 200, 600 seconds). The sheared mtDNA was checked using a D1000 tape on the Agilent TapeStation 4000 instrument following manufacturer's instructions.

### **1.3 Clean up sheared DNA**

The sheared mtDNA was then cleaned using Agencourt AMPure XP DNA beads according to manufacturer's instructions using 1.5x bead to sample concentration in order to remove small DNA fragments below 50 bp.

### **1.4 Preparing bait libraries**

The human mtDNA bait libraries were prepared using the Illumina TruSeq Nano Library kit. The kit procedure was followed with the exception of when Illumina adapters were added during the ligation step, independently prepared T7 adapters were used instead. These T7 adapters were generated according to the protocol in Carpenter, et al. <sup>2</sup>. After the ligation and clean up step, the human cRNA mt baits were prepared according to the above paper.

### **1.5 Prepare human DNA libraries for capture**

Mouthwash and Oragene DNA extracted samples were prepared using the same Illumina TruSeq Nano Library kit, following the entire protocol. At the adapter ligation step, the adapters contained on a high output DNA adapter plate were used in order to increase sample multiplexing for next generation sequencing.

### **1.6 Capturing human mtDNA using human mt cRNA baits**

The process of enriching human mtDNA for sequencing used the procedure from the aforementioned paper <sup>2</sup>.

### **1.7 Next generation sequencing of enriched captured human mtDNA fragments**

Once the captured mtDNA from each of the sample libraries was enriched, these captured DNA pools were used to seed the Illumina next generation sequencing protocol. The pool was quantified



using the Agilent TapeStation and the Qubit™ RNA assay kit for Qubit 2.0® Fluorometer (Life technologies). The indexed libraries were then prepared for paired end sequencing on a NextSeq instrument using the Mid Output 150 cycle kit (Illumina) as per manufacturer's instructions. The captured pools were sequenced using 2x 75 base reads from either end of the library insert.

### **1.8 Bioinformatics of the sequenced enriched captured human mtDNA fragments**

Once the data was generated on the NextSeq instrument, the data was then demultiplexed to sort the data into the indexes used for each original mouthwash or Oragene sample. The files generated were fastq files for each index. These files were then used to align reads back to the human mt sequence from HG build 19. Once the alignment of the reads was finalized for each sample a report was generated to determine the coverage, depth and SNPs/SNVs that differed from the reference genome.

#### **References:**

- 1 Rieder, M. J., Taylor, S. L., Tobe, V. O. & Nickerson, D. A. Automating the identification of DNA variations using quality-based fluorescence re-sequencing: analysis of the human mitochondrial genome. *Nucleic Acids Research* **26**, 967-973 (1998).
- 2 Carpenter, M. L. *et al.* Pulling out the 1%: whole-genome capture for the targeted enrichment of ancient DNA sequencing libraries. *Am J Hum Genet* **93**, 852-864 (2013).
